# Supplementary material for: Graft dysfunction in chronic antibody-mediated rejection correlates with B-cell–dependent indirect antidonor alloresponses and autocrine regulation of interferon-γ production by Th1 cells
Source: PubMed Central journal article supplement (PMC5258815; doi:10.1016/j.kint.2016.10.009), 2017-02
Supplement: mmc8.pdf [file mmc8.pdf]

## Supplementary tables

### Supplementary Table 1a.

Patients excluded from analysis of outcomes because eGFR at first ELISPOT  $\leq 20$  mls/min/1.73m<sup>2</sup> OR because follow-up data missing

| ID   | Age<br>(yr) | Sex | Biopsy<br>Subgroup           | MDRD eGFR<br>at<br>First<br>ELISPOT | PCR>50 | Cumulative DSA MFI |                 | C4d<br>(ptc)<br>score | C4d<br>(g)<br>score | aTG<br>(g $\geq$ 1) | PTCitis<br>(ptc $\geq$ 1) | cg $\geq$ 1 / cv $\geq$<br>1 | IF / TA<br>(%) | $\Delta$<br>MDRD<br>eGFR |
|------|-------------|-----|------------------------------|-------------------------------------|--------|--------------------|-----------------|-----------------------|---------------------|---------------------|---------------------------|------------------------------|----------------|--------------------------|
|      |             |     |                              |                                     |        | Time<br>point 1    | Time<br>point 2 |                       |                     |                     |                           |                              |                |                          |
| 807  | 50.4        | F   | BFC-CAMR<br>Graft failure    | 15.2                                | Y      | 0                  | 0               | 1                     | 1                   | N                   | Y                         | Y / Y †                      | 50             | -9.4                     |
| 2006 | 51.7        | F   | BFC-CAMR<br>Graft failure    | 19.6                                | Y      | 0                  | 2132            | 1                     | 2                   | Y                   | N                         | Y / Y                        | 15             | -9.2                     |
| 2010 | 41.1        | F   | BFC-CAMR<br>Graft failure    | 15.1                                | Y      | 7849               | 4738            | 3                     | 3                   | Y                   | Y                         | N / Y †                      | 50             | -4.5                     |
| 787  | 56.8        | M   | BFC-CAMR                     | 56                                  | -*     | 2642               | *               | 1                     | 0                   | N                   | Y                         | N / Y                        | 30             | *                        |
| 1339 | 48.3        | F   | BFC-CAMR<br>Graft failure    | 18.4                                | Y      | 279                | 88              | 0                     | 0                   | Y                   | N                         | Y / N                        | 0              | -5.6                     |
| 1132 | 58.2        | F   | BFC-ACR<br>Graft Failure     | 11.4                                | Y      | 6378               | 0               | 2                     | 3                   | Y                   | N                         | Y / Y                        | 50             | -1.7                     |
| 278  | 44.8        | F   | BFC-Control                  | 26.5                                | Y      | 0                  | *               | 0                     | 0                   | N                   | N                         | N / Y                        | 25             | *                        |
| 832  | 39.1        | M   | BFC-Control<br>Graft failure | 19.6                                | Y      | 0                  | 393             | 0                     | 0                   | N                   | N                         | N / N                        | 40             | -3.5                     |
| 1448 | 59.4        | M   | BFC-CAMR<br>Graft Failure    | 18.3                                | Y      | 350                | **              | 2                     | 1                   | N                   | N                         | Y / Y \$                     | 20             | -1.40                    |

\* no data

† Majority of PTC have >5 layers of basement membrane on EM.

**Supplementary Table 1b.**

Basic demographics, biopsy results and eGFR data on the 'stable' subgroup with  $\Delta$ eGFR >median in either PROTCL or BFC group

| ID   | Age (yr) | Sex | Biopsy Subgroup        | MDRD eGFR at<br>First ELISPOT | PCR >50 | Cumulative DSA MFI |                 | C4d (ptc)<br>score | C4d (g)<br>score | aTG (g≥1) | PTC itis (ptc≥1) | cg ≥ 1/cv ≥ 1 | IF /<br>TA<br>(%) | Δ<br>MDRD<br>eGFR |
|------|----------|-----|------------------------|-------------------------------|---------|--------------------|-----------------|--------------------|------------------|-----------|------------------|---------------|-------------------|-------------------|
|      |          |     |                        |                               |         | Time<br>point 1    | Time<br>point 2 |                    |                  |           |                  |               |                   |                   |
|      |          |     |                        |                               |         | 739                | 71.3            |                    |                  |           |                  |               |                   |                   |
| 165  | 53.5     | M   | BFC-CAMR               | 27.8                          | N       | 0                  | 0               | 1                  | 2                | N         | Y                | Y / Y         | 20                | 2.67              |
| 326  | 44.1     | M   | BFC-CAMR               | 32.1                          | Y       | 4263               | 4803            | 0                  | 0                | Y         | Y                | Y / Y         | 30                | -3.02             |
| 145  | 46.0     | M   | BFC-Control            | 70                            | N       | 0                  | 0               | 0                  | 2                | N         | N                | N / Y         | 20                | 9.10              |
| 397  | 48.1     | M   | BFC-CAMR               | 61.3                          | Y       | 0                  | 382             | 0                  | 1                | Y         | N                | Y / N \$      | 10                | 3.61              |
| 438  | 51.4     | M   | BFC-CAMR               | 46.1                          | Y       | 3809               | 2579            | 0                  | 1                | Y         | N                | Y / Y*        | 15                | -6.43             |
| 841  | 50.6     | M   | BFC-CAMR               | 40                            | N       | 5149               | 11896           | 1                  | 0                | N         | N                | Y / N         | 15                | 4.24              |
| 965  | 42.4     | M   | BFC-CAMR               | 61.1                          | N       | 0                  | 0               | 1                  | 0                | N         | N                | Y / N         | 0                 | 0.27              |
| 1030 | 52.8     | M   | BFC-Control            | 48.1                          | N       | 0                  | 300             | 0                  | 0                | N         | N                | N / N         | 5                 | 1.34              |
| 1275 | 41.9     | F   | BFC-Control            | 29.2                          | N       | 0                  | 0               | 0                  | 0                | N         | N                | N / Y         | 15                | -2.50             |
| 2063 | 40.4     | F   | BFC-Control            | 35.7                          | N       | 0                  | 0               | 0                  | 0                | N         | N                | N / **        | 0                 | -1.86             |
| 158  | 28.8     | M   | BFC-Control            | 54.9                          | N       | 0                  | 0               | 0                  | 0                | N         | N                | N / N         | 20                | -5.26             |
| 654  | 32.0     | M   | BFC-CAMR               | 38.3                          | N       | 0                  | 9434            | 0                  | 0                | N         | Y                | N / Y®        | 30                | 2.84              |
| 664  | 29.6     | F   | BFC-CAMR               | 43.3                          | Y       | 2411               | 164             | 2                  | 3                | Y         | Y                | N / N         | 30                | 18.82             |
| 676  | 40.2     | M   | BFC-CAMR               | 32                            | Y       | 15700              | 6604            | 0                  | 0                | N         | Y                | N / Y®        | 25                | -7.78             |
| 2009 | 68.8     | M   | BFC-CAMR               | 82.7                          | Y       | 0                  | 0               | 0                  | 2                | N         | Y                | Y / N         | 10                | -1.32             |
| 2019 | 67.4     | M   | BFC-CAMR               | 70.7                          | Y       | 129                | 0               | 1                  | 3                | N         | N                | Y / N         | 15                | 19.68             |
| 736  | 50.0     | F   | BFC-CAMR<br>+tubulitis | 30.8                          | Y       | 16239              | 31063           | 3                  | 2                | N         | N                | Y / Y \$      | 40                | -7.56             |
| 170  | 61.2     | M   | PROTCL-AMR             | 33                            | N       | 0                  | 413             | 2                  | 0                | N         | N                | N / N         | 10                | -1.24             |
| 407  | 64.2     | F   | PROTCL-AMR             | 44                            | N       | 0                  | 0               | 0                  | 0                | Y         | N                | N / N         | 10                | -0.90             |

|      |      |   |                                  |      |         |         |         |         |         |         |         |                   |     |       |
|------|------|---|----------------------------------|------|---------|---------|---------|---------|---------|---------|---------|-------------------|-----|-------|
| 1450 | 57.6 | F | PROTCL-AMR                       | 42   | N       | 0       | 0       | 0       | 2       | Y       | N       | N / N             | 30  | 3.20  |
| 1451 | 55.7 | M | PROTCL-AMR                       | 37   | N       | 0       | 0       | 2       | 2       | N       | N       | N / N             | 20  | 1.49  |
| 2001 | 49.6 | F | PROTCL-AMR                       | 49   | N       | 0       | 0       | 1       | 3       | Y       | Y       | N / N             | 5   | 2.10  |
| 2003 | 46.7 | F | PROTCL-AMR                       | 49   | N       | 0       | 0       | 0       | 2       | N       | N       | N / N             | <10 | -2.42 |
| 2005 | 30.1 | F | PROTCL-AMR                       | 60   | N       | 0       | 0       | 2       | 2       | N       | N       | N / N             | <5  | -3.19 |
|      |      |   | Median                           | 43.3 |         | -       | -       | -       | -       | -       | -       | -                 | 15  | 0.26  |
|      |      |   | IQR                              | 21.9 |         | -       | -       | -       | -       | -       | -       | -                 | 10  | 5.7   |
|      |      |   | Number (%) positive ***          | --   | 8 (32)  | 6(24)   | 7 (29)  | 10 (40) | 13 (52) | 7 (28)  | 7(28)   | 10 (40) / 9 (38)  | -   | -     |
|      |      |   | Number (%) negative              | -    | 17 (68) | 19 (76) | 17 (71) | 15 (60) | 12 (48) | 18 (72) | 18 (72) | 15 (60) / 15 (62) | -   | -     |
|      |      |   | Median score (in positive group) | -    |         | -       | -       | 2       | 2       | -       | -       | -                 | -   | -     |
|      |      |   |                                  |      |         |         |         |         |         |         |         |                   |     |       |

\* Features of chronic TMA with glomerulopathy (+/- arterial lesions).

Some biopsies showed PTCBMML (>5 layers) by EM: \$ some PTCBMML present. † Majority of PTC have >5 layers of BM. ® Repeat biopsies on 2 patients during follow-up; C4d (PTC) >2, C4d

(g) 1, PTC 1, g1, cg >1, cv2, IF/TA >30%,EM \$

\*\* no data

\*\*\* for DSA, number (%) > with MFI 1000

**Supplementary Table 1c.**

Basic demographics, biopsy results and eGFR data on the 'deteriorating' subgroup with  $\Delta eGFR \leq$  median in either PROTCL or BFC group

| ID   | Age<br>(yr) | Sex | Biopsy Subgroup                         | MDRD eGFR<br><br>at<br>First<br>ELISPOT | PCR>50 | Cumulative DSA |         | C4d<br>(ptc)<br>score | C4d<br>(g)<br>score | aTG<br>(g $\geq$ 1) | PTCititis<br>(ptc $\geq$ 1) | cg $\geq$ 1 / cv $\geq$ 1 | IF /<br>TA<br>(%) | $\Delta$<br>MDRD<br>eGFR |
|------|-------------|-----|-----------------------------------------|-----------------------------------------|--------|----------------|---------|-----------------------|---------------------|---------------------|-----------------------------|---------------------------|-------------------|--------------------------|
|      |             |     |                                         |                                         |        | Time           | Time    |                       |                     |                     |                             |                           |                   |                          |
|      |             |     |                                         |                                         |        | point 1        | point 2 |                       |                     |                     |                             |                           |                   |                          |
| 399  | 52.1        | F   | BFC-CAMR                                | 45.7                                    | N      | 2800           | 0       | 0                     | 1                   | Y                   | N                           | Y / Y                     | 20                | -14.68                   |
| 635  | 61.0        | M   | BFC-CAMR<br>Graft failure               | 45.3                                    | Y      | 3800           | 5851    | 2                     | 2                   | Y                   | N                           | Y / N *                   | 10                | -35.34                   |
| 254  | 41.3        | M   | BFC-CAMR<br>Graft failure               | 32                                      | Y      | 0              | 0       | 1                     | 2                   | N                   | Y                           | N / Y                     | 40                | -12.66                   |
| 392  | 54.2        | M   | BFC-CAMR<br>Graft failure               | 48.2                                    | Y      | 3128           | 2540    | 1                     | 2                   | N                   | N                           | Y / Y \$                  | 50                | -33.74                   |
| 1364 | 62.3        | F   | BFC-CAMR                                | 28                                      | Y      | 0              | 0       | 0                     | 0                   | Y                   | N                           | Y / Y                     | 20                | -19.13                   |
| 1404 | 64.3        | M   | BFC-CAMR<br>Graft failure               | 44.1                                    | Y      | 0              | 0       | 0                     | 0                   | Y                   | Y                           | N / N                     | 15                | -30.36                   |
| 2002 | 37.8        | M   | BFC-CAMR<br>Graft failure               | 26                                      | Y      | 811            | 0       | 0                     | 0                   | N                   | N                           | Y / Y \$                  | 75                | -24.60                   |
| 2062 | 45.3        | M   | BFC-CAMR<br>Graft failure               | 39.1                                    | Y      | 4150           | 14892   | 2                     | 3                   | Y                   | Y                           | Y / Y                     | 25                | -21.38                   |
| 223  | 37.8        | M   | BFC-CAMR<br>+tubulitis<br>Graft failure | 47.2                                    | Y      | 2867           | 3897    | 3                     | 3                   | Y                   | Y                           | Y / N                     | 0                 | -14.41                   |
| 516  | 42.2        | M   | BFC-CAMR<br>+tubulitis<br>Graft failure | 20.6                                    | N      | 3087           | 1123    | 2                     | 3                   | Y                   | Y                           | N / N \$                  | 30                | -8.01                    |
| 1423 | 37.8        | F   | BFC-CAMR<br>Graft failure               | 22.4                                    | Y      | 2323           | 4997    | 2                     | 3                   | N                   | Y                           | Y / Y                     | 60                | -9.93                    |
| 864  | 45.5        | M   | BFC-CAMR<br>+tubulitis                  | 35.2                                    | Y      | 1752           | 4875    | 2                     | 3                   | Y                   | N                           | N / Y \$                  | 20                | -11.41                   |
| 835  | 35.7        | M   | BFC-CAMR<br>Graft failure               | 46.4                                    | Y      | 3158           | 1953    | 1                     | 2                   | N                   | Y                           | N / N                     | 30                | -29.10                   |
| 1440 | 28.5        | M   | BFC-CAMR                                | 62.6                                    | Y      | 0              | 0       | 0                     | 2                   | Y                   | N                           | N / N                     | 15                | -9.4                     |
| 459  | 39.9        | F   | BFC-Control                             | 31.1                                    | Y      | 0              | 0       | 0                     | 0                   | N                   | N                           | N / Y                     | 30                | -10.10                   |
| 861  | 51.9        | F   | BFC-CAMR                                | 27.1                                    | Y      | 0              | 111     | 2                     | 0                   | Y                   | N                           | Y / Y*                    | 25                | -23.60                   |
| 31   | 49.5        | F   | BFC-CAMR<br>Graft failure               | 39.3                                    | Y      | 0              | 500     | 0                     | 1                   | Y                   | N                           | Y / Y \$                  | 20                | -26.75                   |
| 1438 | 52.0        | M   | BFC-CAMR                                | 31.1                                    | Y      | 208            | 707     | 0                     | 0                   | Y                   | N                           | N / N †                   | 15                | -9.12                    |
| 2037 | 65.5        | M   | BFC-CAMR                                | 51.5                                    | Y      | 3589           | **      | 1                     | 2                   | N                   | N                           | N / Y †                   | 20                | -13.29                   |
| 61   | 48.2        | M   | PROTCL-AMR                              | 56                                      | N      | 0              | 0       | 2                     | 2                   | Y                   | N                           | N / N                     | 10                | -4.18                    |
| 497  | 42.0        | F   | PROTCL-AMR                              | 47                                      | N      | 98             | 816     | 0                     | 0                   | Y                   | N                           | N / N                     | 10                | -7.70                    |

|      |      |   |                                  |      |         |         |         |         |         |         |         |                   |    |        |
|------|------|---|----------------------------------|------|---------|---------|---------|---------|---------|---------|---------|-------------------|----|--------|
| 958  | 57.0 | F | PROTCL-AMR                       | 58   | N       | 0       | 1302    | 0       | 0       | Y       | N       | N / N             | 0  | -44.15 |
| 1187 | 49.0 | M | PROTCL-AMR                       | 70   | N       | 0       | 0       | 1       | 2       | N       | N       | N / N             | <5 | -5.82  |
| 1442 | 36.0 | M | PROTCL-AMR                       | 48   | N       | 167     | 144     | 3       | 3       | N       | N       | N / N             | 20 | -11.70 |
| 2030 | 56.4 | F | PROTCL-AMR                       | 32   | N       | 0       | 0       | 2       | 0       | N       | N       | N / N             | 20 | -8.34  |
| 1997 | 50.0 | M | PROTCL-AMR                       | 61   | N       | 3575    | 4465    | 3       | 3       | N       | Y       | N / N             | 10 | -18.26 |
| 1444 | 60.1 | F | PROTCL-Control                   | 50   | N       | 0       | 0       | 0       | 0       | N       | N       | N / N             | 15 | -25.02 |
|      |      |   | Median                           | 45.3 |         | -       | -       | -       | -       | -       | -       | -                 | 20 | -14.4  |
|      |      |   | IQR                              | 17.6 |         | -       | -       | -       | -       | -       | -       | -                 | 15 | 15.2   |
|      |      |   | Number (%) positive***           | -    | 17 (63) | 12 (44) | 11 (42) | 16 (59) | 17 (63) | 14 (52) | 8 (30)  | 10 (37) / 13 (48) | -  | -      |
|      |      |   | Number (%) negative              | -    | 10 (37) | 15 (56) | 15 (58) | 11 (41) | 10 (37) | 13 (48) | 19 (70) | 17 (63) / 14 (52) | -  | -      |
|      |      |   | Median score (in positive group) | -    |         | -       | -       | 2       | 2       | -       | -       | -                 | -  | -      |
|      |      |   |                                  |      |         |         |         |         |         |         |         |                   |    |        |

\* Features of chronic TMA with glomerulopathy (+/- arterial lesions).

Some biopsies showed PTCBMML (>5 layers) by EM: \$ some PTCBMML present. † Majority of PTC have >5 layers of BM. ® Repeat biopsies on 2 patients during follow-up; C4d (PTC) >2, C4d

(g) 1, PTC 1, g1, cg >1, cv2, IF/TA >30%, EM \$

\*\* no data

\*\*\* for DSA, number (%) > with MFI 1000
