# Supplementary material for: Graft dysfunction in chronic antibody-mediated rejection correlates with B-cell–dependent indirect antidonor alloresponses and autocrine regulation of interferon-γ production by Th1 cells
Source: PubMed Central journal article supplement (PMC5258815; doi:10.1016/j.kint.2016.10.009), 2017-02
Supplement: mmc9.pdf [file mmc9.pdf]

**Supplementary table 2a - impact of reducing threshold for positive DSA to >0**

| Entire cohort (n=52) | MFI of DSA | Number of samples |                  | P value *   | Number of samples            |                       | P value * |
|----------------------|------------|-------------------|------------------|-------------|------------------------------|-----------------------|-----------|
|                      |            | Graft failure     | No graft failure |             | Deteriorating eGFR (≤median) | Stable eGFR (>median) |           |
| <b>Time point 1</b>  | >0 (n=22)  | 8                 | 14               | <b>0.04</b> | 15                           | 7                     | 0.05      |
|                      | 0 (n=30)   | 3                 | 27               |             | 12                           | 18                    |           |
| <b>Time point 2</b>  | >0 (n=26)  | 8                 | 18               | 0.17        | 15                           | 11                    | 0.41      |
|                      | 0 (n=25)   | 3                 | 22               |             | 11                           | 14                    |           |
| <b>Overall**</b>     | >0 (n=30)  | 9                 | 21               | 0.09        | 18                           | 12                    | 0.26      |
|                      | 0 (n=22)   | 2                 | 20               |             | 9                            | 13                    |           |

**Supplementary table 2b – Lack of association between DSA and outcomes in BFC cohort only**

| BFC cohort (n=37)   | MFI of DSA        | Number of samples |                  | P value * | Number of samples            |                       | P value * |
|---------------------|-------------------|-------------------|------------------|-----------|------------------------------|-----------------------|-----------|
|                     |                   | Graft failure     | No graft failure |           | Deteriorating eGFR (≤median) | Stable eGFR (>median) |           |
| <b>Time point 1</b> | >1000 (n=16)      | 7                 | 9                | 0.15      | 10                           | 6                     | 0.32      |
|                     | 0 or <1000 (n=21) | 4                 | 17               |           | 9                            | 12                    |           |
| <b>Time point 2</b> | >1000 (n=15)      | 7                 | 8                | 0.14      | 8                            | 7                     | 1         |
|                     | 0 or <1000 (n=21) | 4                 | 17               |           | 10                           | 11                    |           |
| <b>Overall**</b>    | >1000 (n=18)      | 7                 | 11               | 0.3       | 10                           | 8                     | 0.75      |
|                     | 0 or <1000 (n=19) | 4                 | 15               |           | 9                            | 10                    |           |

**Supplementary table 2c – Lack of association between DSA and outcomes in PRTCOL cohort only**

| PRTCOL cohort (n=15) | MFI of DSA        | Number of samples |                  | P value * | Number of samples            |                       | P value * |
|----------------------|-------------------|-------------------|------------------|-----------|------------------------------|-----------------------|-----------|
|                      |                   | Graft failure     | No graft failure |           | Deteriorating eGFR (≤median) | Stable eGFR (>median) |           |
| <b>Time point 1</b>  | >1000 (n=1)       | 0                 | 1                | 1         | 1                            | 0                     | 1         |
|                      | 0 or <1000 (n=14) | 0                 | 14               |           | 7                            | 7                     |           |
| <b>Time point 2</b>  | >1000 (n=2)       | 0                 | 2                | 1         | 2                            | 0                     | 0.5       |
|                      | 0 or <1000 (n=13) | 0                 | 13               |           | 6                            | 7                     |           |
| <b>Overall**</b>     | >1000 (n=2)       | 0                 | 2                | 1         | 2                            | 0                     | 0.5       |
|                      | 0 or <1000 (n=13) | 0                 | 13               |           | 6                            | 7                     |           |

\* Fisher exact test

\*\*Overall i.e. DSA at either time point 1 or 2 or both

Graft Failure:

Sensitivity of DSA>0: Time point 1 8/11=73%,

Positive predictive value of DSA>0: time point 1 8/23=35%.

Negative predictive value of DSA 0: Time point 1 26/29=90%.

Specificity: Time point 1 26/41=63%.
