# Supplementary material for: Graft dysfunction in chronic antibody-mediated rejection correlates with B-cell–dependent indirect antidonor alloresponses and autocrine regulation of interferon-γ production by Th1 cells
Source: PubMed Central journal article supplement (PMC5258815; doi:10.1016/j.kint.2016.10.009), 2017-02
Supplement: mmc10.pdf [file mmc10.pdf]

**Supplementary table 3 – Associations between ELISPOT pattern and outcomes in PROTCL (A) and BFC (B) subgroups.**

| A                              | ELISPOT pattern | Number of samples |                  | P value * | Number of samples                   |                           | P value * |
|--------------------------------|-----------------|-------------------|------------------|-----------|-------------------------------------|---------------------------|-----------|
|                                |                 | Graft failure     | No Graft failure |           | Deteriorating eGFR ( $\leq$ median) | Stable eGFR ( $>$ median) |           |
| Time point 1                   | DSR (n=5)       | 0                 | 5                | 1         | 4                                   | 1                         | 0.26      |
|                                | NDSR (n=8)      | 0                 | 8                |           | 3                                   | 5                         |           |
| Time point 2                   | DSR (n=6)       | 0                 | 6                | 1         | 3                                   | 3                         | 1         |
|                                | NDSR (n=9)      | 0                 | 9                |           | 5                                   | 4                         |           |
| Change to or maintenance of:** | DSR (n=6)       | 0                 | 6                | 1         | 3                                   | 3                         | 1         |
|                                | NDSR (n=7)      | 0                 | 7                |           | 4                                   | 3                         |           |

| B                              | ELISPOT pattern | Number of samples |                  | P value *   | Number of samples                   |                           | P value *   |
|--------------------------------|-----------------|-------------------|------------------|-------------|-------------------------------------|---------------------------|-------------|
|                                |                 | Graft failure     | No Graft failure |             | Deteriorating eGFR ( $\leq$ median) | Stable eGFR ( $>$ median) |             |
| Time point 1                   | DSR (n=15)      | 3                 | 12               | 0.26        | 7                                   | 8                         | 0.74        |
|                                | NDSR (n=17)     | 7                 | 10               |             | 9                                   | 8                         |             |
| Time point 2                   | DSR (n=11)      | 5                 | 6                | 0.09        | 8                                   | 3                         | <b>0.03</b> |
|                                | NDSR (n=21)     | 3                 | 17               |             | 6                                   | 15                        |             |
| Change to or maintenance of:** | DSR (n=9)       | 5                 | 4                | <b>0.02</b> | 7                                   | 2                         | <b>0.01</b> |
|                                | NDSR (n=18)     | 2                 | 16               |             | 4                                   | 14                        |             |

\* Fisher exact test

\*\* in paired samples only (i.e samples in which ELISPOTS available at both time points)
