# Supplementary material for: Graft dysfunction in chronic antibody-mediated rejection correlates with B-cell–dependent indirect antidonor alloresponses and autocrine regulation of interferon-γ production by Th1 cells
Source: PubMed Central journal article supplement (PMC5258815; doi:10.1016/j.kint.2016.10.009), 2017-02
Supplement: mmc11.pdf [file mmc11.pdf]

**Supplementary table 4: Association between anti-donor reactivity based on functional B cell phenotype and patient outcomes in PROTCL (A) and BFC (B) cohorts**

**A**

|                                       | ELISPOT pattern                   | Number of samples |                  | P value * | Number of samples                   |                           | P value *   |
|---------------------------------------|-----------------------------------|-------------------|------------------|-----------|-------------------------------------|---------------------------|-------------|
|                                       |                                   | Graft failure     | No Graft failure |           | Deteriorating eGFR ( $\leq$ median) | Stable eGFR ( $>$ median) |             |
| <b>Time point 1</b>                   | No evidence of B-dependence (n=5) | 0                 | 5                | 1         | 0                                   | 5                         | <b>0.02</b> |
|                                       | Evidence of B-dependence (n=7)    | 0                 | 7                |           | 6                                   | 1                         |             |
| <b>Time point 2</b>                   | No evidence of B-dependence (n=6) | 0                 | 6                | 1         | 1                                   | 5                         | 0.1         |
|                                       | Evidence of B-dependence (n=8)    | 0                 | 8                |           | 6                                   | 2                         |             |
| <b>Change to or maintenance of:**</b> | No evidence of B-dependence (n=5) | 0                 | 5                | 1         | 1                                   | 4                         | 0.09        |
|                                       | Evidence of B-dependence (n=8)    | 0                 | 8                |           | 6                                   | 2                         |             |

**B**

|                                       | ELISPOT pattern                    | Number of samples |                  | P value * | Number of samples                   |                           | P value * |
|---------------------------------------|------------------------------------|-------------------|------------------|-----------|-------------------------------------|---------------------------|-----------|
|                                       |                                    | Graft failure     | No Graft failure |           | Deteriorating eGFR ( $\leq$ median) | Stable eGFR ( $>$ median) |           |
| <b>Time point 1</b>                   | No evidence of B-dependence (n=8)  | 2                 | 7                | 0.7       | 4                                   | 4                         | 1         |
|                                       | Evidence of B-dependence (n=18)    | 6                 | 11               |           | 10                                  | 8                         |           |
| <b>Time point 2</b>                   | No evidence of B-dependence (n=13) | 1                 | 12               | 0.09      | 4                                   | 9                         | 0.26      |
|                                       | Evidence of B-dependence (n=16)    | 6                 | 10               |           | 9                                   | 7                         |           |
| <b>Change to or maintenance of:**</b> | No evidence of B-dependence (n=11) | 1                 | 10               | 0.17      | 3                                   | 8                         | 0.1       |
|                                       | Evidence of B-dependence (n=13)    | 5                 | 8                |           | 8                                   | 5                         |           |

\* Fisher exact test
