# Supplementary material for: Graft dysfunction in chronic antibody-mediated rejection correlates with B-cell–dependent indirect antidonor alloresponses and autocrine regulation of interferon-γ production by Th1 cells
Source: PubMed Central journal article supplement (PMC5258815; doi:10.1016/j.kint.2016.10.009), 2017-02
Supplement: mmc12.pdf [file mmc12.pdf]

**Supplementary Table 5: PROTCL cohort – factors used for prediction modelling**

| <b>Model</b>                              | <b>Factors included</b>                                                                                                                                                | <b>AUC</b> | <b>AUC<br/>95% CI</b> |
|-------------------------------------------|------------------------------------------------------------------------------------------------------------------------------------------------------------------------|------------|-----------------------|
| Demographic                               | Age<br>Sex<br>Ethnicity (Caucasian/ Non-Caucasian)<br>Previous acute rejection<br>MDRD at time of protocol biopsy                                                      | 0.741      | 0.46 –<br>1.0         |
| Recipient Factors from time of Transplant | Age at transplant<br>Type of transplant<br>Time on dialysis pre-transplant<br>Time on transplant waiting list pre-transplant                                           | 0.833      | 0.59 –<br>1.0         |
| Donor Factors                             | Class I mismatches<br>Class II mismatches<br>Cold ischaemic time<br>Donor age<br>Donor sex<br>Donor Cause of death                                                     | 0.796      | 0.56 –<br>1.0         |
| HLA                                       | HLA status (at time of protocol biopsy)<br>MICA status (-"-)<br>HLA MFI<br>DSA MFI                                                                                     | 0.833      | 0.63 –<br>1.0         |
| Protocol Biopsy                           | C4d positivity in glomeruli<br>C4d positivity in peritubular capillaries<br>Microvascular inflammation (g or ptc $\geq 1$ )<br>Interstitial fibrosis / tubular atrophy | 0.843      | 0.63 –<br>1.0         |
| ELISPOT                                   | DSR<br>B-dependent reactivity post-CD25 depletion<br>Evidence of regulation by B cells                                                                                 | 0.912      | 0.76 –<br>1.0         |
