# Supplementary material for: Graft dysfunction in chronic antibody-mediated rejection correlates with B-cell–dependent indirect antidonor alloresponses and autocrine regulation of interferon-γ production by Th1 cells
Source: PubMed Central journal article supplement (PMC5258815; doi:10.1016/j.kint.2016.10.009), 2017-02
Supplement: mmc13.pdf [file mmc13.pdf]

**Supplementary Table 6: BFC cohort – factors used for prediction modelling**

| <b>Model</b>     | <b>Factors included</b>                                                                                                                                                                                                                                                                                                           | <b>AUC</b> | <b>AUC<br/>95% CI</b> |
|------------------|-----------------------------------------------------------------------------------------------------------------------------------------------------------------------------------------------------------------------------------------------------------------------------------------------------------------------------------|------------|-----------------------|
| Demographic      | Age<br>Sex<br>Ethnicity (Caucasian/ Non-Caucasian)<br>Previous acute rejection<br>MDRD at time of biopsy for cause                                                                                                                                                                                                                | 0.757      | 0.58 –<br>0.93        |
| Other Factors    | Number of transplant<br>Type of transplant<br>PRA pre-transplant (categorised as >70 or <70)<br>Proteinuria at time of biopsy<br>Deteriorating 1/Cr at time of biopsy<br>Protocolised treatment with Tac/MMF/Rituximab<br>Class I HLA MM, Class II HLA MM, donor age, donor sex,<br>donor cause of death, delayed graft function? | 0.817      | 0.63 –<br>0.96        |
| HLA Ab           | HLA status<br>MICA status<br>HLA MFI at time of biopsy<br>DSA MFI at time of biopsy<br>MICA weak / strong at time of biopsy                                                                                                                                                                                                       | 0.668      | 0.49 –<br>0.84        |
| Biopsy for Cause | C4d positivity in glomeruli<br>C4d positivity in peritubular capillaries<br>Microvascular inflammation (g or ptc $\geq 1$ )<br>Transplant glomerulopathy (cg i.e. double contours)<br>Interstitial fibrosis / tubular atrophy                                                                                                     | 0.804      | 0.66 –<br>0.94        |
| ELISPOT          | B-dependent DSR<br>B-dependent reactivity post-CD25 depletion                                                                                                                                                                                                                                                                     | 0.527      | 0.53 –<br>0.91        |
