# Supplementary material for: Graft dysfunction in chronic antibody-mediated rejection correlates with B-cell–dependent indirect antidonor alloresponses and autocrine regulation of interferon-γ production by Th1 cells
Source: PubMed Central journal article supplement (PMC5258815; doi:10.1016/j.kint.2016.10.009), 2017-02
Supplement: mmc14.pdf [file mmc14.pdf]

**Supplementary Table 7: Dynamic changes in ELISPOT patterns.**

|                                  |                |                                          |                                                          | Time Point 2                          |                                           |                                      |                                                    |                                      |                                                           |                                          |                                       | T2 ND or Not fully interpretable |                      |
|----------------------------------|----------------|------------------------------------------|----------------------------------------------------------|---------------------------------------|-------------------------------------------|--------------------------------------|----------------------------------------------------|--------------------------------------|-----------------------------------------------------------|------------------------------------------|---------------------------------------|----------------------------------|----------------------|
|                                  |                |                                          |                                                          | NDSR                                  |                                           |                                      |                                                    | DSR                                  |                                                           |                                          |                                       |                                  |                      |
|                                  |                | Interpretation based on B cell phenotype | No regulation                                            | 'Breg'                                |                                           | 'Treg', 'Breg'                       |                                                    | 'Treg'                               | Bdep                                                      |                                          |                                       |                                  |                      |
|                                  |                |                                          | No regulation                                            | 'Breg': only when CD25+ cells present | 'Breg': when CD25+ cells present / absent | 'Breg': only when CD25+ cells absent | 'Breg' when CD25 present / 'Bdep' when CD25 absent | 'Bdep': only when CD25+ cells absent | 'Bdep': when CD25 present, 'Breg' when CD25+ cells absent | 'Bdep' when CD25+ cells present / absent | 'Bdep': only when CD25+ cells present |                                  |                      |
| Time point 1                     | NDSR           | No regulation                            | No regulation                                            | 1364<br>399<br>739<br>2019            | 407<br>(P)***                             | 1451 (P)                             | 1450<br>(P)                                        |                                      |                                                           |                                          |                                       | 1442<br>(P)†                     | 736                  |
|                                  |                | 'Breg'                                   | 'Breg': only when CD25+ cells present                    | 2005 (P)                              |                                           |                                      |                                                    |                                      |                                                           | 2001 (P)                                 | 835†                                  |                                  |                      |
|                                  |                |                                          | 'Breg': when CD25+ cells present and absent              | 664                                   |                                           |                                      |                                                    |                                      |                                                           |                                          |                                       | 2062                             |                      |
|                                  |                | 'Treg', 'Breg'                           | 'Breg': only when CD25+ cells absent                     |                                       |                                           |                                      |                                                    |                                      |                                                           |                                          | 635                                   |                                  |                      |
|                                  |                |                                          | 'Breg' when CD25 present BUT 'Bdep' when CD25 absent,    | **2063                                |                                           |                                      | 165                                                | **254***<br>**145                    | 61 (P)                                                    |                                          |                                       |                                  | 1404                 |
|                                  | 'Treg', 'Bdep' | 'Bdep' only when CD25+ cells absent      | 392                                                      |                                       |                                           |                                      |                                                    | 1187<br>(P)                          | 223<br>676                                                |                                          | 2009                                  |                                  |                      |
|                                  | DSR            | 'Bdep'                                   | 'Bdep' when CD25 present, 'Breg' when CD25+ cells absent |                                       |                                           |                                      |                                                    |                                      |                                                           |                                          |                                       |                                  | 31*                  |
|                                  |                |                                          | 'Bdep' when CD25+ cells present and absent               |                                       | 958 (P)                                   |                                      |                                                    | 326                                  | 1444<br>(P)<br>438                                        | 864                                      |                                       | 2030 (P)<br>459                  | 2002<br>2037<br>1440 |
|                                  |                |                                          | 'Bdep': only when CD25+ cells present                    | 158†<br>841†<br>1030†                 |                                           |                                      |                                                    |                                      | 397                                                       |                                          |                                       | 497 (P)<br>170 (P)               |                      |
| T1 ND or Not fully interpretable |                |                                          | 965                                                      | 1438                                  | 2003 (P)                                  |                                      |                                                    | 516                                  |                                                           | 861                                      | 654                                   | 1275#<br>1423#<br>1997<br>(P)    |                      |

\*\* DSR Breg at time point 1

\*\*\* DSR with Breg at time point 2

† these samples had incomplete testing at T1, making it difficult to ascribe a particular pattern, and are therefore included in the not done/not viable row in table 2a, but difference between T1 & T2 nevertheless discernible on T2 sample alone.

# these samples were NDSR T1

Patients highlighted in yellow are in the 'stable' subgroup, whereas those highlighted in red are in the 'deteriorating' subgroup.
