# Supplementary material for: Graft dysfunction in chronic antibody-mediated rejection correlates with B-cell–dependent indirect antidonor alloresponses and autocrine regulation of interferon-γ production by Th1 cells
Source: PubMed Central journal article supplement (PMC5258815; doi:10.1016/j.kint.2016.10.009), 2017-02
Supplement: mmc15.pdf [file mmc15.pdf]

**Supplementary table 8: Dynamic changes in anti-viral antigen ELISPOT patterns and lack of association with outcome.**

| Interpretation based on B cell phenotype |                                                |                                                                | Time Point 2**                                  |                                                                |                                                             |                                             |
|------------------------------------------|------------------------------------------------|----------------------------------------------------------------|-------------------------------------------------|----------------------------------------------------------------|-------------------------------------------------------------|---------------------------------------------|
|                                          |                                                |                                                                | No response                                     | Evidence of Regulation                                         |                                                             | No evidence of regulation                   |
|                                          |                                                |                                                                |                                                 | Regulated anti-viral response without evidence of B-dependency | B dependent anti-viral response with evidence of regulation | Unregulated B-dependent anti-viral response |
| Time point 1*                            | No evidence of B-dependent anti-viral response | No response                                                    | <b>8 patients: 3 stable, 5 deteriorating</b>    |                                                                |                                                             |                                             |
|                                          |                                                | Regulated anti-viral response without evidence of B-dependency |                                                 |                                                                |                                                             |                                             |
|                                          | Evidence of B-dependent anti-viral response    | B dependent anti-viral response with evidence of regulation    | <b>15 patients: 9 stable, 6 deteriorating</b>   |                                                                |                                                             |                                             |
|                                          |                                                | Unregulated B-dependent anti-viral response                    |                                                 |                                                                |                                                             |                                             |
|                                          |                                                |                                                                | <b>7 patients: 3 stable, 4 deteriorating***</b> |                                                                |                                                             |                                             |

\* 10 additional patients with time point 2 samples had time point 1 samples that were not either not done or not fully interpretable, so they are not included in this analysis

\*\* 5 additional patients with time point 1 samples had time point 2 samples that were not either not done or not fully interpretable, so they are not included in this analysis

4 patients had neither time point 1 or 2 samples that could be interpreted by B cell phenotype so they are not included here.

2 patients had ELISPOT patterns that had a B-independent phenotype at one or other time points,

\*\*\*Comparison of stable and deteriorating patients in each group: p=0.63 Fisher Exact Probability 3x2 test

Refer to supplementary table 9 for full details of all results.
